# Supplementary material for: Influence of halogens on the crystal packing of 3,4,5,6-tetra-chloro-phthalate-based lanthanide coordination compounds
Source: Royal Society of Chemistry journal article supplement (doi:10.1039/d4ce00966e), 2024-12-09
Supplement: d4ce00966e1.pdf [file d4ce00966e1.pdf]

# SUPPORTING INFORMATION

Halogen influence on the crystal packing of  
3,4,5,6-tetra-chloro-phthalate-based lanthanide coordination  
compounds.

Fallou Ngomb<sup>b</sup>, Chloé Blais<sup>a</sup>, Insa Badiane,<sup>b</sup> Christine Hénaff,<sup>a</sup> Magatte Camara<sup>b</sup>, Carole Daiguebonne<sup>a</sup> \* and Olivier Guillou<sup>a, c</sup> \*

<sup>a</sup> Univ Rennes, INSA Rennes, CNRS UMR 6226 "Institut des Sciences Chimiques de Rennes",  
35708 Rennes, France.

<sup>b</sup> Université Assane Seck de Ziguinchor, "Laboratoire de Chimie et de Physique des Matériaux",  
BP 523 Ziguinchor, Sénégal.

<sup>c</sup> Institut Universitaire de France, 1 rue Descartes, 75005 Paris, France

\* To whom correspondence should be addressed.

olivier.guillou@insa-rennes.fr ; carole.daiguebonne@insa-rennes.fr

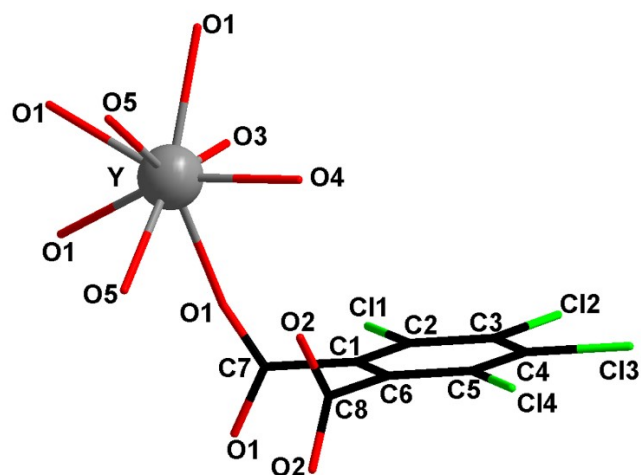

**Figure S1.** Asymmetric unit of  $[Y(tcpa)(OH)(H_2O)_3]_\infty$  (**1**) with the numbering scheme. H atoms have been omitted for clarity.

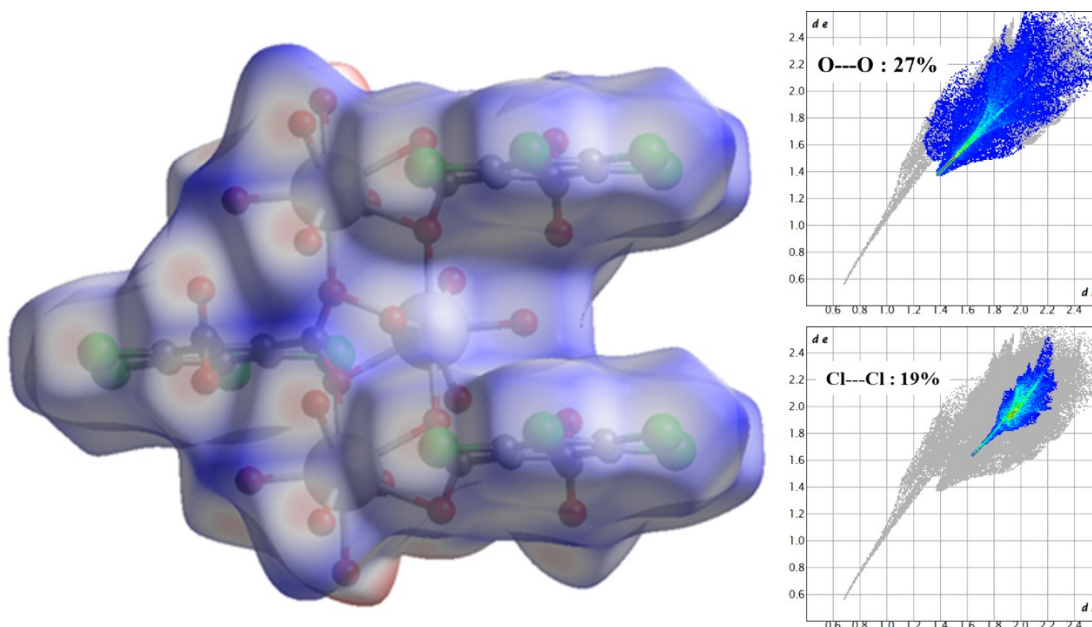

**Figure S2.**  $d_{norm}$  surface (left) and fingerprint plots (right) of the molecular motif of  $[Y(tcpa)(OH)(H_2O)_3]_\infty$  (**1**).

**Table S1.** Continuous Shape Measurements (CShM) for  $[Y(tcpa)(OH)(H_2O)_3]_\infty$  (**1.**). The lower is the CShM value, the better is the agreement with the given coordination polyhedron.

| [ML <sub>8</sub> ] | OP-8   | HPY-8  | HBPY-8 | CU-8   | SAPR-8 | TDD-8 | JGBF-8 | JETBPY-8 | JBTPR-8 | <b>BTPR-8</b> | JSD-8 | TT-8   | ETBPY-8 |
|--------------------|--------|--------|--------|--------|--------|-------|--------|----------|---------|---------------|-------|--------|---------|
| Y                  | 30.785 | 23.560 | 17.560 | 13.311 | 3.225  | 2.882 | 14.543 | 28.746   | 2.835   | <b>2.209</b>  | 4.882 | 13.893 | 24.499  |

OP-8  $\equiv D_{8h}$ -Octagon; HPY-8  $\equiv C_{7v}$ -Heptagonal pyramid; HBPY-8  $\equiv D_{6h}$ -Hexagonal bipyramid; CU-8  $\equiv O_h$ -Cube; SAPR-8  $\equiv D_{4d}$ -Square antiprism; TDD-8  $\equiv D_{2d}$ -Triangular dodecahedron; JGBF-8  $\equiv D_{2d}$ -Johnson gyrobifastigium J26; JETBPY-8  $\equiv D_{3h}$ -Johnson elongated triangular bipyramid J14; JBTPR-8  $\equiv C_{2v}$ -Biaugmented trigonal prism J50; **BTPR-8**  $\equiv C_{2v}$ -**Biaugmented trigonal prism**; JSD-8  $\equiv D_{2d}$ -Snub diphenooid J84; TT-8  $\equiv T_d$ -Triakis tetrahedron; ETBPY-8  $\equiv D_{3h}$ -Elongated trigonal bipyramid.

**Table S2.** Cl-Cl distances shorter than 3.5 Å in  $[Y(\text{tcpa})(\text{OH})(\text{H}_2\text{O})_3]_\infty$  (**1.**).

| Atom1 | Atom2 | Symmetry code of Atom2 | Distance (Å) |
|-------|-------|------------------------|--------------|
| Cl4   | Cl3   | x, y, z                | 3.1016       |
|       | Cl1   | -1+x, y, z             | 3.2798       |
| Cl3   | Cl4   | x, y, z                | 3.1016       |
|       | Cl2   | x, y, z                | 3.1323       |
| Cl2   | Cl1   | x, y, z                | 3.1185       |
|       | Cl3   | x, y, z                | 3.1323       |
| Cl1   | Cl2   | x, y, z                | 3.1185       |
|       | Cl4   | 1+x, y, z              | 3.2798       |

**Table S3.** O-O distances shorter than 3.0 Å in  $[Y(\text{tcpa})(\text{OH})(\text{H}_2\text{O})_3]_\infty$  (**1.**).

| Atom1 | Atom2 | Symmetry code of Atom2 | Distance (Å) |
|-------|-------|------------------------|--------------|
| O2    | O2    | x, 0.5-y, z            | 2.1964       |
|       | O5    | -x, 1-y, 2-z           | 2.7459       |
|       | O4    | x, y, z                | 2.7684       |
| O1    | O1    | x, 0.5-y, z            | 2.1570       |
|       | O3    | x, y, z                | 2.8381       |
|       | O1    | 1-x, 1-y, 2-z          | 2.9082       |
|       | O5    | x, y, z                | 2.9388       |
| O3    | O5    | 1-x, 0.5+y, 2-z        | 2.7612       |
|       | O5    | 1-x, 1-y, 2-z          | 2.7612       |
|       | O1    | x, 1.5-y, z            | 2.8381       |
|       | O1    | x, y, z                | 2.8381       |
| O4    | O2    | x, y, z                | 2.7684       |
|       | O2    | x, 1.5-y, z            | 2.7684       |
| O5    | O2    | -x, 1-y, 2-z           | 2.7459       |
|       | O3    | 1-x, -0.5+y, 2-z       | 2.7612       |
|       | O5    | x, 1.5-y, z            | 2.8593       |
|       | O1    | x, y, z                | 2.9388       |

**Table S4.** Continuous Shape Measurements (CShM) for Nd<sub>4</sub>(tcpa)<sub>6</sub>(H<sub>2</sub>O)<sub>22</sub>·8H<sub>2</sub>O (**2.**). The lower is the CShM value, the better is the agreement with the given coordination polyhedron.

| [ML <sub>9</sub> ] | EP-9   | OPY-9  | HBPY-9 | JTC-9  | JCCU-9 | CCU-9 | JCSAPR-9 | <b>CSAPR-9</b> | JTCTPR-9 | TCTPR-9 | JTDIC-9 | HH-9   | <b>MFF-9</b> |
|--------------------|--------|--------|--------|--------|--------|-------|----------|----------------|----------|---------|---------|--------|--------------|
| Nd1                | 35.983 | 23.060 | 18.251 | 15.275 | 10.731 | 9.045 | 2.095    | 1.323          | 2.680    | 1.386   | 13.132  | 9.021  | <b>0.988</b> |
| Nd2                | 36.111 | 21.890 | 18.594 | 16.827 | 10.943 | 9.629 | 1.962    | <b>0.864</b>   | 3.264    | 1.031   | 12.697  | 10.459 | 0.916        |

EP-9  $\equiv D_{9h}$ -Enneagon; OPY-9  $\equiv C_{8v}$ -Octagonal pyramid; HBPY-9  $\equiv D_{7h}$ -Heptagonal bipyramid; JTC-9  $\equiv C_{3v}$ -Johnson triangular cupola J3; JCCU-9  $\equiv C_{4v}$ -Capped cube J8; CCU-9  $\equiv C_{4v}$ -Spherical-relaxed capped cube; JCSAPR-9  $\equiv C_{4v}$ -Capped square antiprism J10; **CSAPR-9**  $\equiv C_{4v}$ -**Spherical capped square antiprism**; JTCTPR-9  $\equiv D_{3h}$ -Tricapped trigonal prism J51; TCTPR-9  $\equiv D_{3h}$ -Spherical tricapped trigonal prism; JTDIC-9  $\equiv C_{3v}$ -Tridiminished icosahedron J63; HH-9  $\equiv C_{2v}$ -Hula-hoop; **MFF-9**  $\equiv C_s$ -**Muffin**.

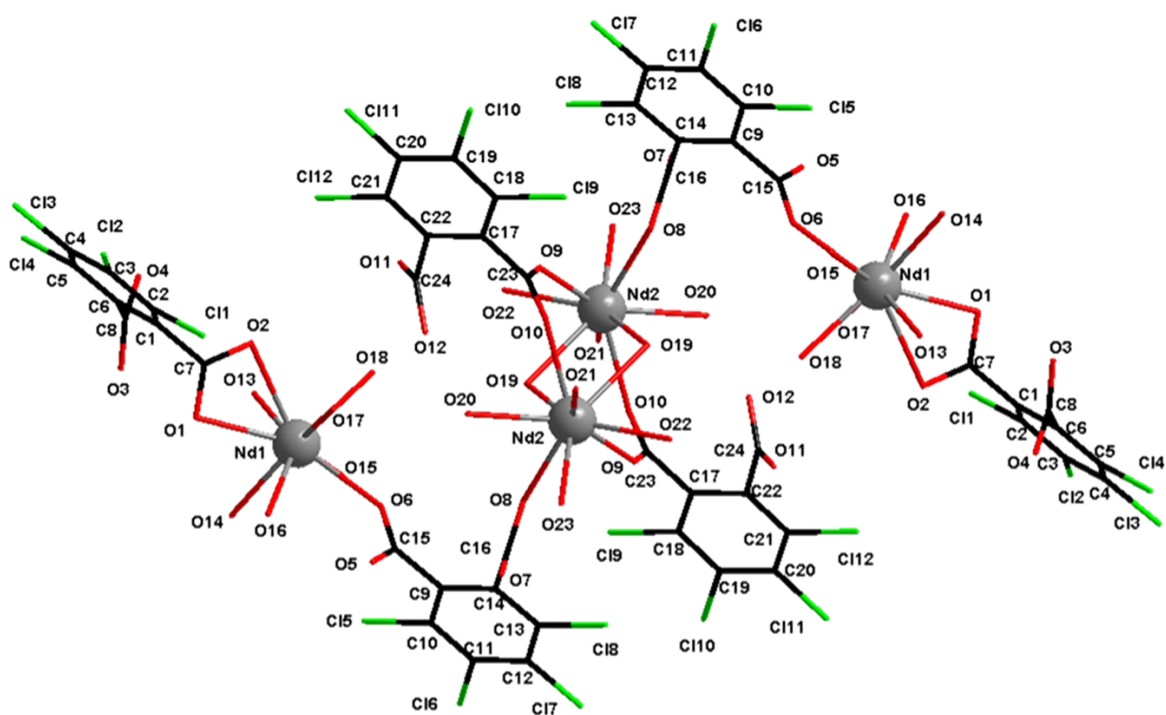

**Figure S3.** Projection view of the tetranuclear molecular motif of  $[\text{Nd}_4(\text{tcpa})_6(\text{H}_2\text{O})_{22} \cdot 8\text{H}_2\text{O}$  (**2.**) with the numbering scheme.

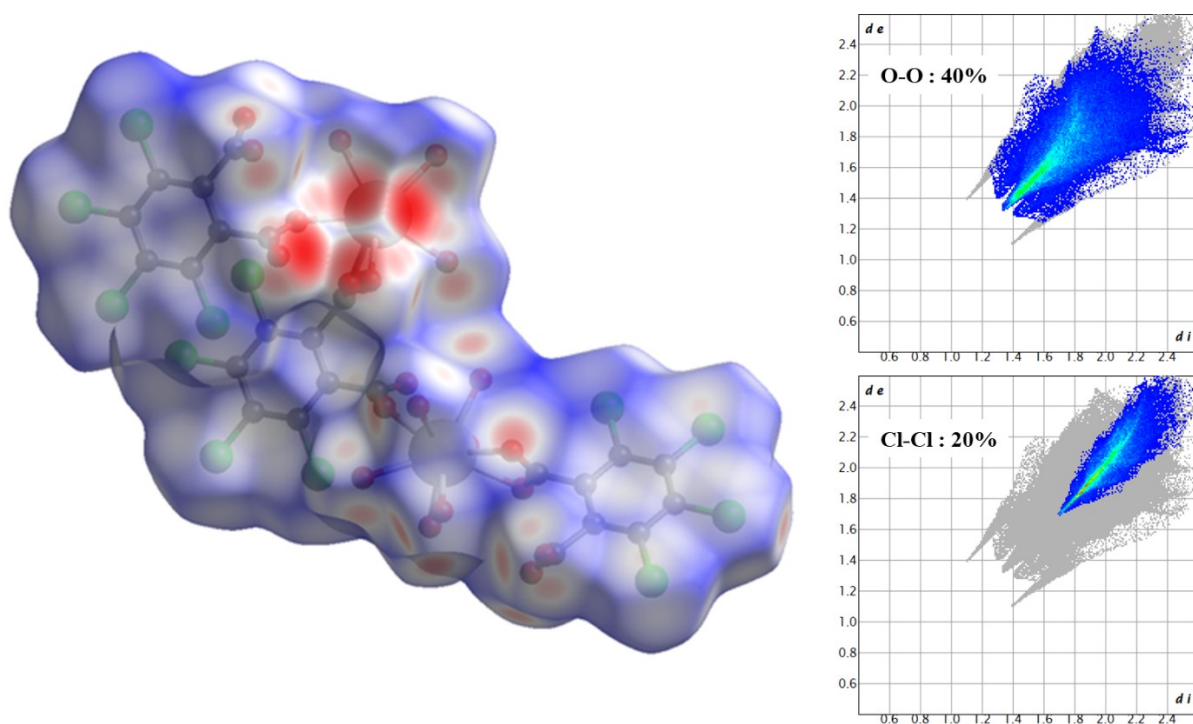

**Figure S4.**  $d_{\text{norm}}$  surface (left) and fingerprint plots (right) of the molecular motif of  $[\text{Nd}_4(\text{tcpa})_6(\text{H}_2\text{O})_{22} \cdot 8\text{H}_2\text{O}$  (**2.**).

**Table S5.** O-O distances shorter than 3.0 Å in Nd<sub>4</sub>(tcpa)<sub>6</sub>(H<sub>2</sub>O)<sub>22</sub>·8H<sub>2</sub>O (**2.**).

| Atom1 | Atom2 | Symmetry code of Atom2 | Distance (Å)  |        |
|-------|-------|------------------------|---------------|--------|
| O19   | OW4   | x, y, z                | 2.6573        |        |
|       | O9    | 1-x, 1-y, 1-z          | 2.7790        |        |
|       | O10   | x, y, z                | 2.8311        |        |
|       | O12   | 1-x, 1-y, 1-z          | 2.8415        |        |
|       | O8    | x, y, z                | 2.8813        |        |
|       | O22   | 1-x, 1-y, 1-z          | 2.9836        |        |
|       | O10   | 1-x, 1-y, 1-z          | 2.9873        |        |
| O20   | O7    | 2-x, 1-y, 1-z          | 2.6936        |        |
|       | O12   | 1-x, 1-y, 1-z          | 2.7626        |        |
| O10   | O10   | 1-x, 1-y, 1-z          | 2.8720        |        |
|       | O3    | x, y, -1+z             | 2.7705        |        |
| O22   | O9    | x, y, z                | 2.7727        |        |
|       | O21   | x, y, z                | 2.8614        |        |
|       | O11   | x, y, z                | 2.9408        |        |
|       | O19   | 1-x, 1-y, 1-z          | 2.9836        |        |
|       | O23   | x, y, z                | 2.9910        |        |
|       | O8    | O9                     | x, y, z       | 2.7721 |
| O8    | O19   | x, y, z                | 2.8813        |        |
|       | O23   | x, y, z                | 2.8902        |        |
|       | O1    | O14                    | 2-x, 1-y, 2-z | 2.7603 |
| O1    | O16   | x, y, z                | 2.9206        |        |
|       | O10   | O21                    | 1-x, 1-y, 1-z | 2.7007 |
| O10   | O19   | x, y, z                | 2.8311        |        |
|       | O20   | 1-x, 1-y, 1-z          | 2.8720        |        |
|       | O19   | 1-x, 1-y, 1-z          | 2.9873        |        |
|       | O17   | OW3                    | x, y, z       | 2.7634 |
|       | O12   | 1-x, 1-y, 1-z          | 2.7981        |        |
| O17   | O16   | x, y, z                | 2.8792        |        |
|       | O18   | x, y, z                | 2.9559        |        |
|       | O2    | x, y, z                | 2.9623        |        |
|       | O6    | O15                    | x, y, z       | 2.7669 |
|       | O16   | x, y, z                | 2.9503        |        |
| O9    | OW4   | x, y, z                | 2.9805        |        |
|       | O8    | x, y, z                | 2.7721        |        |
|       | O22   | x, y, z                | 2.7727        |        |
| OW4   | O19   | 1-x, 1-y, 1-z          | 2.7790        |        |
|       | O19   | x, y, z                | 2.6573        |        |
|       | O4    | 1-x, 1-y, 2-z          | 2.8441        |        |
| OW2   | O6    | x, y, z                | 2.9805        |        |
|       | O2    | x, y, z                | 2.6586        |        |
|       | O13   | 1-x, 1-y, 2-z          | 2.6876        |        |
|       | O15   | 1-x, 1-y, 2-z          | 2.8155        |        |
| O23   | O11   | 1-x, 1-y, 1-z          | 2.8785        |        |
|       | O7    | x, y, z                | 2.5760        |        |
|       | O21   | x, y, z                | 2.8002        |        |

|     |     |               |        |
|-----|-----|---------------|--------|
|     | O5  | 2-x, 1-y, 1-z | 2.8212 |
|     | OW3 | 2-x, 1-y, 1-z | 2.8595 |
|     | O8  | x, y, z       | 2.8902 |
|     | O22 | x, y, z       | 2.9910 |
| O18 | O4  | 1-x, 1-y, 2-z | 2.7272 |
|     | O11 | 1-x, 1-y, 1-z | 2.9524 |
|     | O17 | x, y, z       | 2.9559 |
|     | O15 | x, y, z       | 2.9876 |
| O12 | O20 | 1-x, 1-y, 1-z | 2.7626 |
|     | O17 | 1-x, 1-y, 1-z | 2.7981 |
|     | O19 | 1-x, 1-y, 1-z | 2.8415 |
| O5  | O16 | x, y, z       | 2.7092 |
|     | O23 | 2-x, 1-y, 1-z | 2.8212 |
|     | O21 | 2-x, 1-y, 1-z | 2.8239 |
| O2  | OW2 | x, y, z       | 2.6586 |
|     | O13 | x, y, z       | 2.7272 |
|     | O17 | x, y, z       | 2.9623 |
| O16 | O5  | x, y, z       | 2.7092 |
|     | O3  | 2-x, 1-y, 2-z | 2.8520 |
|     | O17 | x, y, z       | 2.8792 |
|     | O14 | x, y, z       | 2.8879 |
|     | O1  | x, y, z       | 2.9206 |
|     | O6  | x, y, z       | 2.9503 |
| OW1 | O14 | x, y, z       | 2.7350 |
|     | OW3 | 2-x, 1-y, 2-z | 2.8568 |
|     | O11 | x, y, 1+z     | 2.9624 |
| O14 | OW1 | x, y, z       | 2.7350 |
|     | O1  | 2-x, 1-y, 2-z | 2.7603 |
|     | O16 | x, y, z       | 2.8879 |
|     | O15 | x, y, z       | 2.9603 |
| O11 | OW2 | 1-x, 1-y, 1-z | 2.8785 |
|     | O22 | x, y, z       | 2.9408 |
|     | O18 | 1-x, 1-y, 1-z | 2.9524 |
|     | OW1 | x, y, -1+z    | 2.9624 |
| O21 | O10 | 1-x, 1-y, 1-z | 2.7007 |
|     | O23 | x, y, z       | 2.8002 |
|     | O5  | 2-x, 1-y, 1-z | 2.8239 |
|     | O22 | x, y, z       | 2.8614 |
| O7  | O23 | x, y, z       | 2.5760 |
|     | O20 | 2-x, 1-y, 1-z | 2.6936 |
| O15 | O6  | x, y, z       | 2.7669 |
|     | OW2 | 1-x, 1-y, 2-z | 2.8155 |
|     | O13 | x, y, z       | 2.8331 |
|     | O4  | 1-x, 1-y, 2-z | 2.9296 |
|     | O14 | x, y, z       | 2.9603 |
|     | O18 | x, y, z       | 2.9876 |
| OW3 | O17 | x, y, z       | 2.7634 |
|     | OW1 | 2-x, 1-y, 2-z | 2.8568 |
|     | O23 | 2-x, 1-y, 1-z | 2.8595 |
| O13 | OW2 | 1-x, 1-y, 2-z | 2.6876 |



|    |     |               |        |
|----|-----|---------------|--------|
|    | O2  | x, y, z       | 2.7272 |
|    | O15 | x, y, z       | 2.8331 |
| O3 | O22 | x, y, 1+z     | 2.7705 |
|    | O16 | 2-x, 1-y, 2-z | 2.8520 |
| O4 | O18 | 1-x, 1-y, 2-z | 2.7272 |
|    | OW4 | 1-x, 1-y, 2-z | 2.8441 |
|    | O15 | 1-x, 1-y, 2-z | 2.9296 |

**Table S6.** Cl-Cl distances shorter than 3.5 Å in Nd<sub>4</sub>(tcpa)<sub>6</sub>(H<sub>2</sub>O)<sub>22</sub>·8H<sub>2</sub>O (**2**).

| Atom1 | Atom2 | Symmetry code of Atom2 | Distance (Å) |
|-------|-------|------------------------|--------------|
| Cl4   | Cl2   | 1-x, 2-y, 2-z          | 3.4400       |
| Cl8   | Cl7   | 2-x, -y, 1-z           | 3.4036       |
|       | Cl8   | 2-x, -y, 1-z           | 3.5060       |
| Cl7   | Cl8   | 2-x, -y, 1-z           | 3.4036       |
| Cl10  | Cl11  | x, -1+y, z             | 3.4900       |
| Cl11  | Cl10  | x, 1+y, z              | 3.4900       |
| Cl2   | Cl4   | 1-x, 2-y, 2-z          | 3.4400       |

**Table S7.** Continuous Shape Measurements (CShM) for  $[\text{KLa}(\text{tcpa})_2(\text{H}_2\text{O})_{10}\cdot\text{H}_2\text{O}]_\infty$  (**3.**). The lower is the CShM value, the better is the agreement with the given coordination polyhedron.

| [ML <sub>9</sub> ] | EP-9   | OPY-9  | HBPY-9 | JTC-9  | JCCU-9 | CCU-9 | JCSAPR-9 | <b>CSAPR-9</b> | JTCTPR-9 | TCTPR-9 | JTDIC-9 | HH-9   | MFF-9 |
|--------------------|--------|--------|--------|--------|--------|-------|----------|----------------|----------|---------|---------|--------|-------|
| La                 | 36.246 | 20.385 | 19.619 | 16.227 | 10.766 | 9.627 | 1.871    | <b>0.861</b>   | 2.726    | 0.989   | 12.758  | 11.070 | 1.435 |

EP-9  $\equiv D_{9h}$ -Enneagon; OPY-9  $\equiv C_{8v}$ -Octagonal pyramid; HBPY-9  $\equiv D_{7h}$ -Heptagonal bipyramid; JTC-9  $\equiv C_{3v}$ -Johnson triangular cupola J3; JCCU-9  $\equiv C_{4v}$ -Capped cube J8; CCU-9  $\equiv C_{4v}$ -Spherical-relaxed capped cube; JCSAPR-9  $\equiv C_{4v}$ -Capped square antiprism J10; **CSAPR-9  $\equiv C_{4v}$ -Spherical capped square antiprism**; JTCTPR-9  $\equiv D_{3h}$ -Tricapped trigonal prism J51; TCTPR-9  $\equiv D_{3h}$ -Spherical tricapped trigonal prism; JTDIC-9  $\equiv C_{3v}$ -Tridiminished icosahedron J63; HH-9  $\equiv C_{2v}$ -Hula-hoop; MFF-9  $\equiv C_s$ -Muffin.

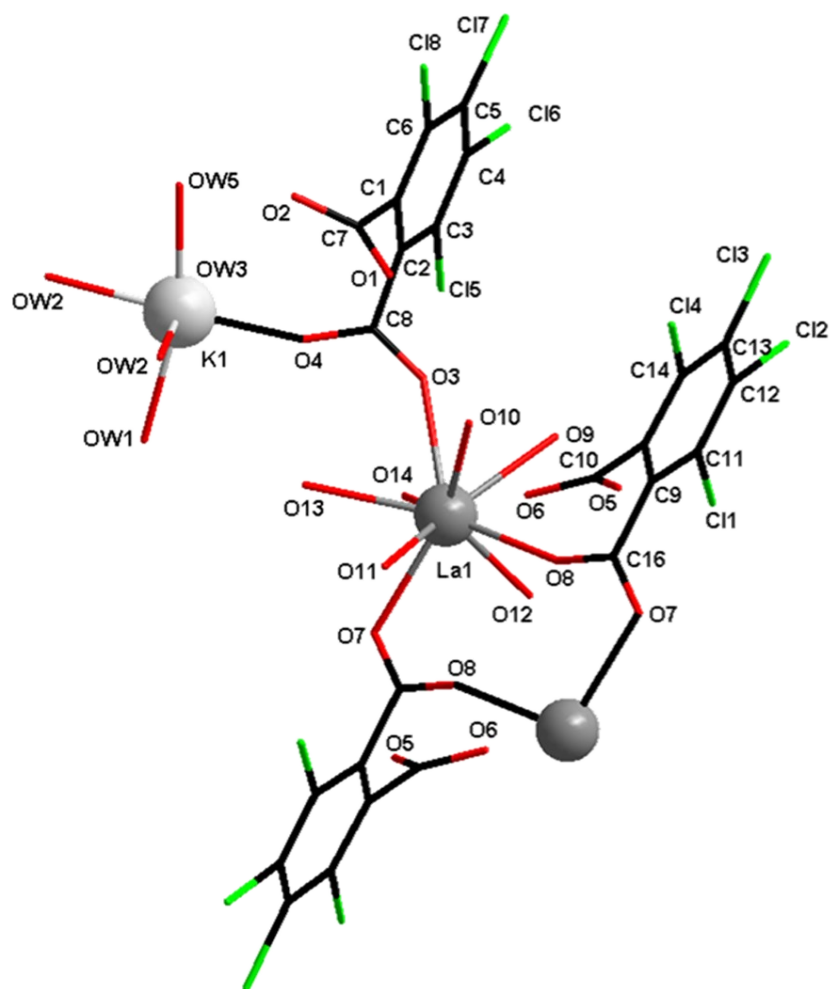

**Figure S5.** Extended asymmetric unit of  $[\text{KLa}(\text{tcpa})_2(\text{H}_2\text{O})_{10}\cdot\text{H}_2\text{O}]_\infty$  (**3**) with the numbering scheme. Hydrogen atoms have been omitted for clarity. K is in light grey and La in dark grey.

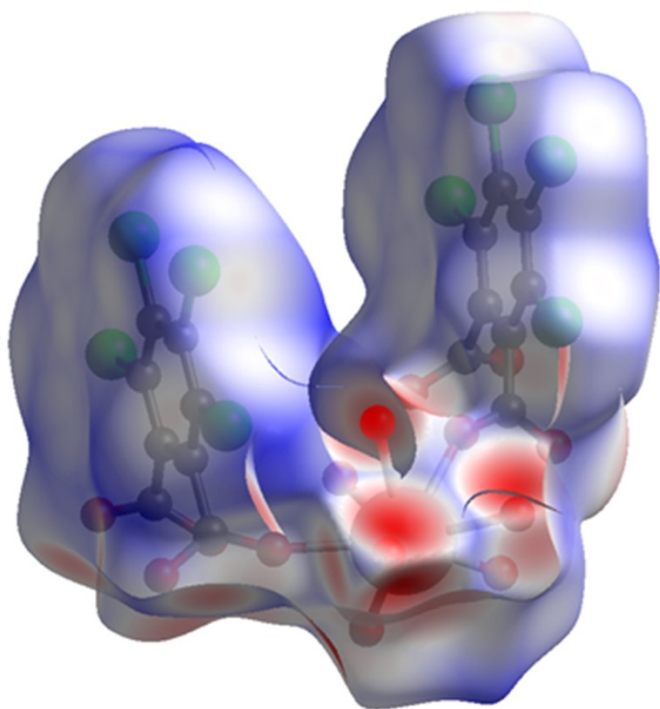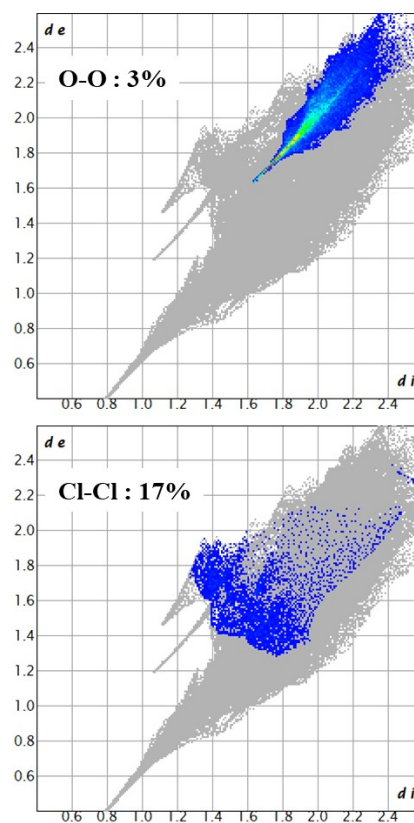

**Figure S6.**  $d_{norm}$  surface (left) and fingerprint plots (right) of the molecular motif of  $[\text{KLa}(\text{tcpa})_2(\text{H}_2\text{O})_{10}\cdot\text{H}_2\text{O}]_\infty$  (**3**).

**Table S8.** Cl-Cl distances shorter than 3.5 Å in  $[\text{KLa}(\text{tcpa})_2(\text{H}_2\text{O})_{10}\cdot\text{H}_2\text{O}]_\infty$  (**3.**).

| Atom1 | Atom2 | Symmetry code of Atom2 | Distance (Å) |
|-------|-------|------------------------|--------------|
| Cl1   | Cl4   | 1+x, y, z              | 3.3767       |
|       | Cl2   | 2-x, 1-y, 1-z          | 3.5177       |
| Cl6   | Cl5   | 2-x, 1-y, -z           | 3.4375       |
| Cl8   | Cl4   | -x, 1-y, 1-z           | 3.2779       |
| Cl5   | Cl6   | 2-x, 1-y, -z           | 3.4375       |
| Cl2   | Cl2   | 2-x, 1-y, 1-z          | 3.4339       |
|       | Cl1   | 2-x, 1-y, 1-z          | 3.5177       |
| Cl4   | Cl8   | -x, 1-y, 1-z           | 3.2779       |
|       | Cl1   | -1+x, y, z             | 3.3767       |

**Table S9.** O-O distances shorter than 3.0 Å in  $[\text{KLa}(\text{tcpa})_2(\text{H}_2\text{O})_{10}\cdot\text{H}_2\text{O}]_\infty$  (**3.**).

| Atom1 | Atom2 | Symmetry code of Atom2 | Distance (Å) |
|-------|-------|------------------------|--------------|
| O12   | O1    | 1+x, y, z              | 2.7005       |
|       | O11   | 2-x, -y, 1-z           | 2.7702       |
|       | O6    | 2-x, -y, 1-z           | 2.9200       |
|       | O14   | x, y, z                | 2.9224       |
|       | O9    | x, y, z                | 2.9283       |
|       | O7    | 2-x, -y, 1-z           | 2.9737       |
|       | O8    | O7                     | x, y, z      |
| O11   |       | 2-x, -y, 1-z           | 2.8679       |
| O8    |       | 2-x, -y, 1-z           | 2.9460       |
| O10   |       | x, y, z                | 2.9767       |
| O14   | O2    | 1+x, y, z              | 2.6713       |
|       | OW1   | 2-x, -y, -z            | 2.8061       |
|       | OW2   | 2-x, -y, -z            | 2.8263       |
|       | O3    | x, y, z                | 2.8812       |
|       | O12   | x, y, z                | 2.9224       |
|       | O7    | 2-x, -y, 1-z           | 2.9820       |
|       | O6    | O5                     | x, y, z      |
| O11   |       | 1-x, -y, 1-z           | 2.7723       |
| O10   |       | x, y, z                | 2.7978       |
| O12   |       | 2-x, -y, 1-z           | 2.9200       |
| O7    |       | O8                     | x, y, z      |
|       | OW3   | x, y, 1+z              | 2.9170       |
|       | O12   | 2-x, -y, 1-z           | 2.9737       |
|       | O14   | 2-x, -y, 1-z           | 2.9820       |
|       | O13   | O4                     | x, y, z      |
| O11   |       | x, y, z                | 2.7774       |
| O3    |       | x, y, z                | 2.8990       |
| O5    |       | 1-x, -y, 1-z           | 2.9879       |
| O3    | O4    | x, y, z                | 2.2349       |
|       | O9    | x, y, z                | 2.6208       |
|       | O10   | x, y, z                | 2.6935       |

|     |     |                |        |
|-----|-----|----------------|--------|
|     | O14 | $x, y, z$      | 2.8812 |
|     | O13 | $x, y, z$      | 2.8990 |
| O9  | O3  | $x, y, z$      | 2.6208 |
|     | O12 | $x, y, z$      | 2.9283 |
| O11 | O12 | $2-x, -y, 1-z$ | 2.7702 |
|     | O6  | $1-x, -y, 1-z$ | 2.7723 |
|     | O13 | $x, y, z$      | 2.7774 |
|     | O8  | $2-x, -y, 1-z$ | 2.8679 |
|     | O10 | $x, y, z$      | 2.9464 |
| O1  | O2  | $x, y, z$      | 2.2348 |
|     | O12 | $-1+x, y, z$   | 2.7005 |
| OW2 | O14 | $2-x, -y, -z$  | 2.8263 |
|     | O5  | $x, y, -1+z$   | 2.8915 |
|     | OW5 | $x, y, z$      | 2.9774 |
| O5  | O6  | $x, y, z$      | 2.2265 |
|     | OW4 | $-1+x, y, 1+z$ | 2.8118 |
|     | OW2 | $x, y, 1+z$    | 2.8915 |
|     | O13 | $1-x, -y, 1-z$ | 2.9879 |
| O2  | O1  | $x, y, z$      | 2.2348 |
|     | O14 | $-1+x, y, z$   | 2.6713 |
|     | OW5 | $x, y, z$      | 2.7291 |
| O4  | O3  | $x, y, z$      | 2.2349 |
|     | O13 | $x, y, z$      | 2.6883 |
| OW1 | O14 | $2-x, -y, -z$  | 2.8061 |
|     | OW5 | $1-x, -y, -z$  | 2.9058 |
| OW5 | O2  | $x, y, z$      | 2.7291 |
|     | OW1 | $1-x, -y, -z$  | 2.9058 |
|     | OW2 | $x, y, z$      | 2.9774 |
| O10 | O3  | $x, y, z$      | 2.6935 |
|     | O6  | $x, y, z$      | 2.7978 |
|     | O11 | $x, y, z$      | 2.9464 |
|     | O8  | $x, y, z$      | 2.9767 |
| OW3 | OW4 | $x, y, z$      | 2.7381 |
|     | O7  | $x, y, -1+z$   | 2.9170 |
| OW4 | OW3 | $x, y, z$      | 2.7381 |
|     | O5  | $1+x, y, -1+z$ | 2.8117 |

---

**Table S10.** Continuous Shape Measurements (CShM) for  $[\text{KLa}(\text{tcpa})_2(\text{H}_2\text{O})_5 \cdot 2\text{H}_2\text{O}]_\infty$  (**4.**). The lower is the CShM value, the better is the agreement with the given coordination polyhedron.

| [ML <sub>9</sub> ] | EP-9   | OPY-9  | HBPY-9 | JTC-9  | JCCU-9 | CCU-9 | JCSAPR-9 | <b>CSAPR-9</b> | JTCTPR-9 | TCTPR-9 | JTDIC-9 | HH-9  | MFF-9 |
|--------------------|--------|--------|--------|--------|--------|-------|----------|----------------|----------|---------|---------|-------|-------|
| La                 | 32.952 | 22.803 | 17.011 | 13.883 | 9.159  | 7.736 | 2.236    | <b>1.449</b>   | 2.483    | 1.783   | 12.438  | 9.254 | 1.680 |

EP-9  $\equiv D_{9h}$ -Enneagon; OPY-9  $\equiv C_{8v}$ -Octagonal pyramid; HBPY-9  $\equiv D_{7h}$ -Heptagonal bipyramid; JTC-9  $\equiv C_{3v}$ -Johnson triangular cupola J3; JCCU-9  $\equiv C_{4v}$ -Capped cube J8; CCU-9  $\equiv C_{4v}$ -Spherical-relaxed capped cube; JCSAPR-9  $\equiv C_{4v}$ -Capped square antiprism J10; **CSAPR-9  $\equiv C_{4v}$ -Spherical capped square antiprism**; JTCTPR-9  $\equiv D_{3h}$ -Tricapped trigonal prism J51; TCTPR-9  $\equiv D_{3h}$ -Spherical tricapped trigonal prism; JTDIC-9  $\equiv C_{3v}$ -Tridiminished icosahedron J63; HH-9  $\equiv C_{2v}$ -Hula-hoop; MFF-9  $\equiv C_s$ -Muffin.

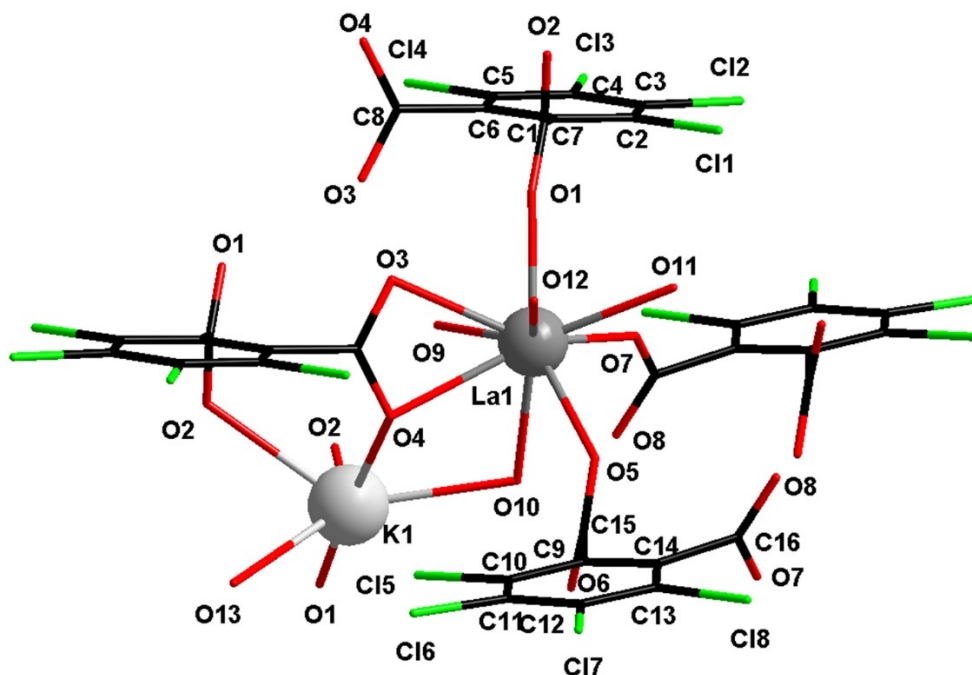

**Figure S7.** Extended asymmetric unit of  $[\text{KLa}(\text{tcpa})_2(\text{H}_2\text{O})_5 \cdot 2\text{H}_2\text{O}]_\infty$  (**4**) with the numbering scheme. Hydrogen atoms have been omitted for clarity. K is in light grey and La in dark grey.

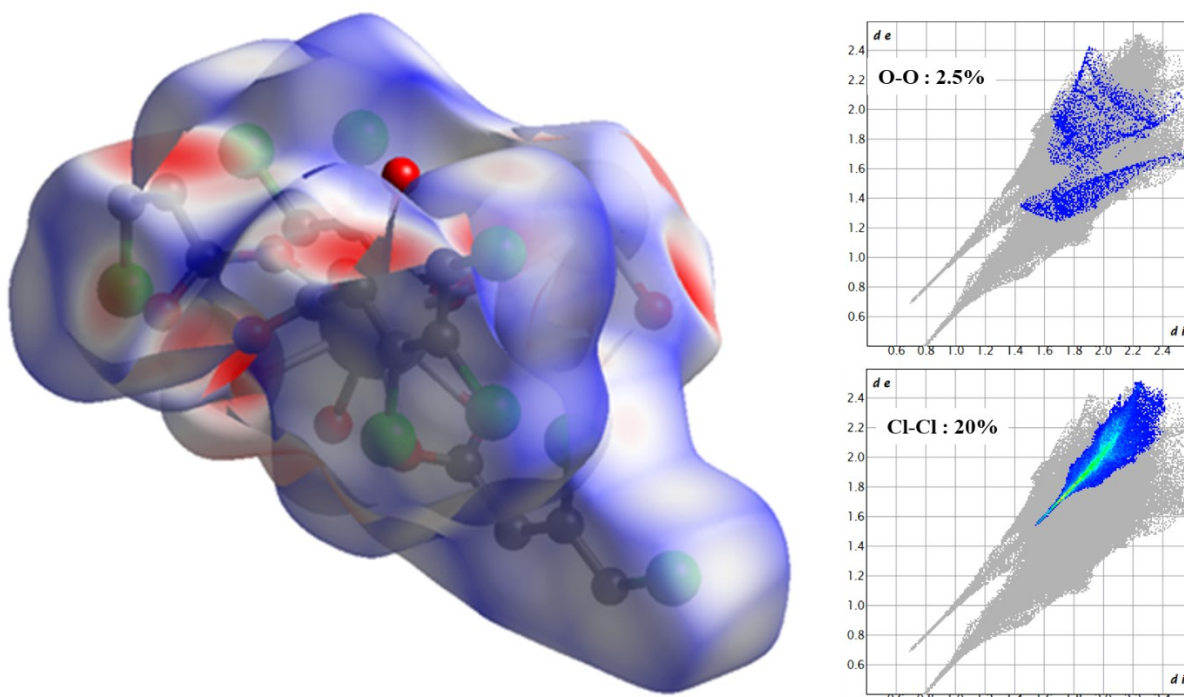

**Figure S8.**  $d_{\text{norm}}$  surface (left) and fingerprint plots (right) of the molecular motif of  $[\text{KLa}(\text{tcpa})_2(\text{H}_2\text{O})_5 \cdot 2\text{H}_2\text{O}]_\infty$  (**4**).



**Table S11.** O-O distances shorter than 3.0 Å in  $[\text{KLa}(\text{tcpa})_2(\text{H}_2\text{O})_5 \cdot 2\text{H}_2\text{O}]_\infty$  (**4.**).

| Atom1 | Atom2 | Symmetry code of Atom2 | Distance (Å) |
|-------|-------|------------------------|--------------|
| O1    | O2    | x, y, z                | 2.2143       |
|       | O3    | 1-x, -y, 1-z           | 2.9023       |
| O2    | O1    | x, y, z                | 2.2143       |
|       | OW2   | -1+x, y, z             | 2.6820       |
| O3    | O4    | x, y, z                | 2.2037       |
|       | O9    | x, y, z                | 2.6962       |
|       | O12   | 1-x, -y, 1-z           | 2.8856       |
|       | O1    | 1-x, -y, 1-z           | 2.9023       |
| O4    | O9    | 1-x, -y, 1-z           | 2.9911       |
|       | O3    | x, y, z                | 2.2037       |
|       | O6    | x, y, z                | 2.2293       |
| O5    | O10   | x, y, z                | 2.9573       |
|       | O12   | x, y, z                | 2.9752       |
|       | O5    | x, y, z                | 2.2293       |
| O6    | O10   | x, y, z                | 2.7386       |
|       | OW1   | 1+x, y, z              | 2.7739       |
|       | O11   | 1-x, 1-y, 1-z          | 2.8161       |
|       | O8    | x, y, z                | 2.2327       |
| O7    | O11   | 1-x, 1-y, 1-z          | 2.8920       |
|       | O7    | x, y, z                | 2.2327       |
| O8    | O10   | 1-x, 1-y, 1-z          | 2.6953       |
|       | OW1   | x, y, z                | 2.7949       |
|       | O3    | x, y, z                | 2.6962       |
|       | OW2   | x, y, z                | 2.7348       |
| O9    | O10   | x, y, z                | 2.8832       |
|       | O3    | 1-x, -y, 1-z           | 2.9911       |
|       | O8    | 1-x, 1-y, 1-z          | 2.6953       |
| O10   | O6    | x, y, z                | 2.7386       |
|       | O9    | x, y, z                | 2.8832       |
|       | O5    | x, y, z                | 2.9573       |
|       | OW1   | x, y, z                | 2.7792       |
| O11   | O12   | x, y, z                | 2.7964       |
|       | O6    | 1-x, 1-y, 1-z          | 2.8161       |
|       | O7    | 1-x, 1-y, 1-z          | 2.8920       |
|       | OW1   | x, y, z                | 2.7506       |
|       | O13   | x, y, z                | 2.7540       |
| O12   | O11   | x, y, z                | 2.7964       |
|       | O3    | 1-x, -y, 1-z           | 2.8856       |
|       | O5    | x, y, z                | 2.9752       |
|       | O12   | x, y, z                | 2.7540       |
| O13   | OW2   | 1-x, -y, 1-z           | 2.8166       |
|       | O12   | x, y, z                | 2.7506       |
| OW1   | O6    | -1+x, y, z             | 2.7739       |
|       | O11   | x, y, z                | 2.7792       |
|       | O8    | x, y, z                | 2.7949       |
| OW2   | O2    | 1+x, y, z              | 2.6820       |
|       | O9    | x, y, z                | 2.7348       |
|       | O13   | 1-x, -y, 1-z           | 2.8166       |

**Table S12.** Cl-Cl distances shorter than 3.5 Å in [KLa(tcpa)<sub>2</sub>(H<sub>2</sub>O)<sub>5</sub>·2H<sub>2</sub>O]<sub>∞</sub> (**4**).

| Atom1 | Atom2 | Symmetry code of<br>Atom2 | Distance (Å) |
|-------|-------|---------------------------|--------------|
| Cl1   | Cl2   | x, y, z                   | 3.1250       |
| Cl2   | Cl1   | x, y, z                   | 3.1250       |
|       | Cl3   | x, y, z                   | 3.1254       |
|       | Cl5   | -1+x, y, 1+z              | 3.3870       |
|       | Cl6   | -1+x, y, 1+z              | 3.4414       |
| Cl3   | Cl4   | x, y, z                   | 3.1028       |
|       | Cl2   | x, y, z                   | 3.1254       |
| Cl4   | Cl3   | x, y, z                   | 3.1028       |
|       | Cl7   | x, -1+y, 1+z              | 3.2991       |
|       | Cl8   | x, -1+y, 1+z              | 3.3871       |
| Cl5   | Cl6   | x, y, z                   | 3.1319       |
|       | Cl2   | 1+x, y, -1+z              | 3.3870       |
| Cl6   | Cl7   | x, y, z                   | 3.1039       |
|       | Cl5   | x, y, z                   | 3.1319       |
|       | Cl2   | 1+x, y, -1+z              | 3.4414       |
| Cl7   | Cl6   | x, y, z                   | 3.1039       |
|       | Cl8   | x, y, z                   | 3.1090       |
|       | Cl4   | x, 1+y, -1+z              | 3.2991       |
| Cl8   | Cl7   | x, y, z                   | 3.1090       |
|       | Cl4   | x, 1+y, -1+z              | 3.3871       |

**Table S13.** Continuous Shape Measurements (CShM) for Y(tcpa)(Htcpa)(H<sub>2</sub>O)<sub>5</sub> (**5.**). The lower is the CShM value, the better is the agreement with the given coordination polyhedron.

| [ML <sub>9</sub> ] | EP-9   | OPY-9  | HBPY-9 | JTC-9  | JCCU-9 | CCU-9 | JCSAPR-9 | CSAPR-9 | JTCTPR-9 | TCTPR-9 | JTDIC-9 | HH-9  | <b>MFF-9</b> |
|--------------------|--------|--------|--------|--------|--------|-------|----------|---------|----------|---------|---------|-------|--------------|
| Y                  | 36.208 | 21.802 | 17.476 | 15.687 | 10.235 | 8.733 | 2.150    | 1.796   | 3.975    | 2.600   | 12.234  | 8.731 | <b>1.634</b> |

EP-9  $\equiv D_{9h}$ -Enneagon; OPY-9  $\equiv C_{8v}$ -Octagonal pyramid; HBPY-9  $\equiv D_{7h}$ -Heptagonal bipyramid; JTC-9  $\equiv C_{3v}$ -Johnson triangular cupola J3; JCCU-9  $\equiv C_{4v}$ -Capped cube J8; CCU-9  $\equiv C_{4v}$ -Spherical-relaxed capped cube; JCSAPR-9  $\equiv C_{4v}$ -Capped square antiprism J10; CSAPR-9  $\equiv C_{4v}$ -Spherical capped square antiprism; JTCTPR-9  $\equiv D_{3h}$ -Tricapped trigonal prism J51; TCTPR-9  $\equiv D_{3h}$ -Spherical tricapped trigonal prism; JTDIC-9  $\equiv C_{3v}$ -Tridiminished icosahedron J63; HH-9  $\equiv C_{2v}$ -Hula-hoop; **MFF-9  $\equiv C_s$ -Muffin.**

**Table S14.** Cl-Cl distances shorter than 3.5 Å in Y(tcpa)(Htcpa)(H<sub>2</sub>O)<sub>5</sub> (**5.**).

| Atom1 | Atom2 | Symmetry code of Atom2 | Distance (Å) |
|-------|-------|------------------------|--------------|
| Cl5   | Cl6   | x, y, z                | 3.0980       |
|       | Cl8   | 0.5-x, y, 0.5+z        | 3.4866       |
| Cl6   | Cl5   | x, y, z                | 3.0980       |
|       | Cl7   | x, y, z                | 3.1028       |
|       | Cl3   | x, -1+y, z             | 3.4307       |
| Cl11  | Cl2   | x, y, z                | 3.1069       |
| Cl7   | Cl6   | x, y, z                | 3.1028       |
|       | Cl8   | x, y, z                | 3.1063       |
| Cl4   | Cl3   | x, y, z                | 3.0882       |
| Cl8   | Cl7   | x, y, z                | 3.1063       |
|       | Cl5   | 0.5-x, y, -0.5+z       | 3.4866       |
| Cl2   | Cl11  | x, y, z                | 3.1069       |
|       | Cl3   | x, y, z                | 3.1080       |
| Cl3   | Cl4   | x, y, z                | 3.0882       |
|       | Cl2   | x, y, z                | 3.1080       |
|       | Cl6   | x, 1+y, z              | 3.4307       |

**Table S15.** O-O distances shorter than 3.0 Å in Y(tcpa)(Htcpa)(H<sub>2</sub>O)<sub>5</sub> (**5.**).

| Atom1 | Atom2 | Symmetry code of Atom2 | Distance (Å) |
|-------|-------|------------------------|--------------|
| O9    | O7    | 0.5-x, y, 0.5+z        | 2.6714       |
|       | O8    | 1-x, 1-y, 0.5+z        | 2.8148       |
|       | O10   | x, y, z                | 2.8646       |
|       | O5    | x, y, z                | 2.9095       |
|       | O1    | x, y, z                | 2.9241       |
|       | O13   | x, y, z                | 2.9394       |
| O2    | O1    | x, y, z                | 2.1952       |
|       | O4    | 0.5-x, y, -0.5+z       | 2.5443       |
|       | O12   | x, y, z                | 2.8920       |
| O11   | O11   | x, y, z                | 2.9278       |
|       | O12   | x, y, z                | 2.6741       |
|       | O6    | -0.5+x, 1-y, z         | 2.7519       |
|       | O5    | x, y, z                | 2.8799       |
|       | O2    | x, y, z                | 2.9278       |
| O1    | O10   | x, y, z                | 2.9554       |
|       | O2    | x, y, z                | 2.1952       |
|       | O13   | x, y, z                | 2.7725       |
|       | O9    | x, y, z                | 2.9241       |
| O8    | O7    | x, y, z                | 2.2255       |
|       | O10   | 0.5-x, y, -0.5+z       | 2.6318       |
|       | O13   | 1-x, 1-y, -0.5+z       | 2.7357       |
|       | O9    | 1-x, 1-y, -0.5+z       | 2.8148       |
| O3    | O4    | x, y, z                | 2.2368       |
|       | O12   | 0.5-x, y, 0.5+z        | 2.7227       |

|     |     |                  |        |
|-----|-----|------------------|--------|
| O13 | O8  | 1-x, 1-y, 0.5+z  | 2.7357 |
|     | O1  | x, y, z          | 2.7725 |
|     | O12 | x, y, z          | 2.7825 |
|     | O5  | 0.5+x, 1-y, z    | 2.8503 |
|     | O9  | x, y, z          | 2.9394 |
| O12 | O6  | x, y, z          | 2.9946 |
|     | O7  | 0.5+x, 1-y, z    | 2.6514 |
|     | O11 | x, y, z          | 2.6741 |
|     | O3  | 0.5-x, y, -0.5+z | 2.7227 |
|     | O13 | x, y, z          | 2.7825 |
| O7  | O2  | x, y, z          | 2.8920 |
|     | O8  | x, y, z          | 2.2255 |
|     | O12 | -0.5+x, 1-y, z   | 2.6514 |
| O10 | O9  | 0.5-x, y, -0.5+z | 2.6714 |
|     | O8  | 0.5-x, y, 0.5+z  | 2.6318 |
|     | O9  | x, y, z          | 2.8646 |
|     | O5  | x, y, z          | 2.9035 |
| O6  | O11 | x, y, z          | 2.9554 |
|     | O5  | x, y, z          | 2.1961 |
|     | O11 | 0.5+x, 1-y, z    | 2.7519 |
| O4  | O13 | x, y, z          | 2.9946 |
|     | O3  | x, y, z          | 2.2368 |
|     | O2  | 0.5-x, y, 0.5+z  | 2.5443 |
| O5  | O6  | x, y, z          | 2.1961 |
|     | O13 | -0.5+x, 1-y, z   | 2.8503 |
|     | O11 | x, y, z          | 2.8799 |
|     | O10 | x, y, z          | 2.9035 |
|     | O9  | x, y, z          | 2.9095 |

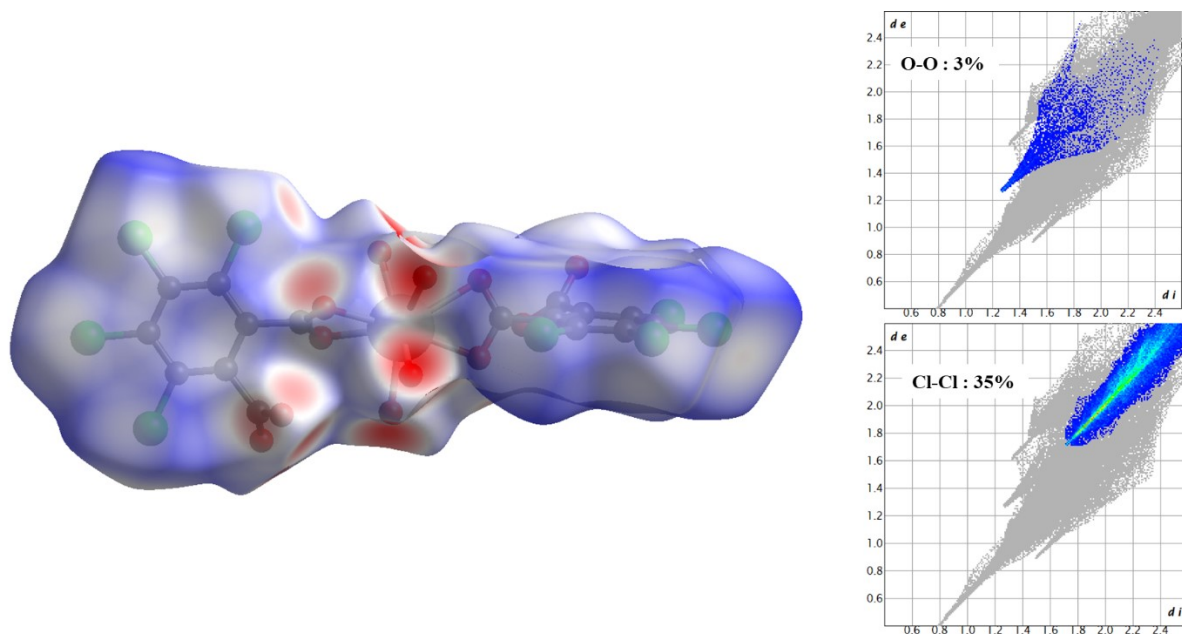

**Figure S9.**  $d_{norm}$  surface (left) and fingerprint plots (right) of the molecular motif of  $Y(tcpa)(Htcpa)(H_2O)_5$  (**5.**).

**Table S16.** Continuous Shape Measurements (CShM) for  $[\text{KTb}(\text{tcpa})_2(\text{H}_2\text{O})_6\cdot\text{H}_2\text{O}]_\infty$  (**6.**). The lower is the CShM value, the better is the agreement with the given coordination polyhedron.

| [ML <sub>8</sub> ] | OP-8   | HPY-8  | HBPY-8 | CU-8   | <b>SAPR-8</b> | TDD-8 | JGBF-8 | JETBPY-8 | JBTPR-8 | BTPR-8 | JSD-8 | TT-8   | ETBPY-8 |
|--------------------|--------|--------|--------|--------|---------------|-------|--------|----------|---------|--------|-------|--------|---------|
| Tb                 | 31.067 | 21.793 | 16.363 | 10.866 | <b>1.282</b>  | 2.226 | 15.066 | 25.603   | 2.477   | 1.868  | 5.066 | 11.608 | 22.369  |

OP-8  $\equiv D_{8h}$ -Octagon; HPY-8  $\equiv C_{7v}$ -Heptagonal pyramid; HBPY-8  $\equiv D_{6h}$ -Hexagonal bipyramid; CU-8  $\equiv O_h$ -Cube; **SAPR-8**  $\equiv D_{4d}$ -**Square antiprism**; TDD-8  $\equiv D_{2d}$ -Triangular dodecahedron; JGBF-8  $\equiv D_{2d}$ -Johnson gyrobifastigium J26; JETBPY-8  $\equiv D_{3h}$ -Johnson elongated triangular bipyramid J14; JBTPR-8  $\equiv C_{2v}$ -Biaugmented trigonal prism J50; BTPR-8  $\equiv C_{2v}$ -Biaugmented trigonal prism; JSD-8  $\equiv D_{2d}$ -Snub diphenooid J84; TT-8  $\equiv T_d$ -Triakis tetrahedron; ETBPY-8  $\equiv D_{3h}$ -Elongated trigonal bipyramid.

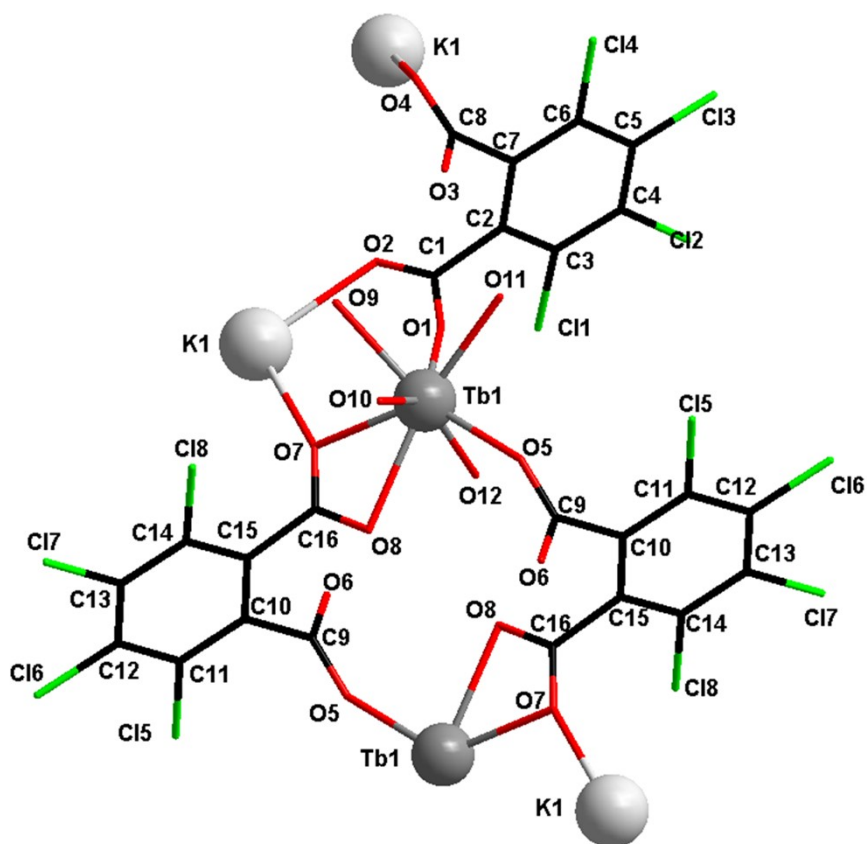

**Figure S10.** Extended asymmetric unit of  $[\text{KTb}(\text{tcpa})_2(\text{H}_2\text{O})_6 \cdot \text{H}_2\text{O}]_\infty$  (**6**) with the numbering scheme. Hydrogen atoms have been omitted for clarity. K is in light grey and Tb in dark grey

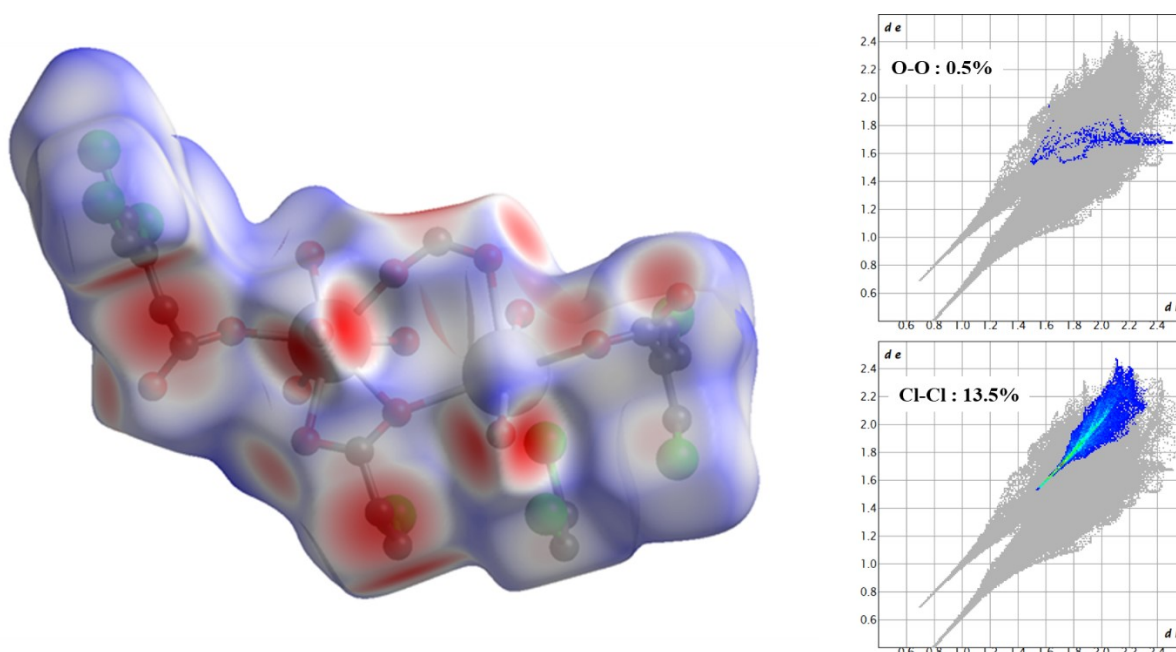

**Figure S11.**  $d_{\text{norm}}$  surface (left) and fingerprint plots (right) of the molecular motif of  $[\text{KTb}(\text{tcpa})_2(\text{H}_2\text{O})_6 \cdot \text{H}_2\text{O}]_\infty$  (**6**).

**Table S17.** O-O distances shorter than 3.0 Å in [KTb(tcpa)<sub>2</sub>(H<sub>2</sub>O)<sub>6</sub>·H<sub>2</sub>O]<sub>∞</sub> (**6**).

| Atom1 | Atom2 | Symmetry code of Atom2 | Distance (Å) |
|-------|-------|------------------------|--------------|
| O1    | O2    | x, y, z                | 2.2131       |
|       | O12   | x, y, z                | 2.7279       |
|       | O9    | x, y, z                | 2.8513       |
|       | O11   | x, y, z                | 2.8526       |
| O2    | O1    | x, y, z                | 2.2131       |
|       | O15   | 2-x, 2-y, 2-z          | 2.7064       |
| O3    | O4    | x, y, z                | 2.2305       |
|       | O11   | x, y, z                | 2.6741       |
|       | O9    | 1-x, 2-y, 2-z          | 2.7167       |
| O4    | O3    | x, y, z                | 2.2305       |
|       | O10   | 1-x, 2-y, 2-z          | 2.7194       |
| O5    | O6    | x, y, z                | 2.2255       |
|       | O11   | x, y, z                | 2.9401       |
|       | O12   | x, y, z                | 2.9543       |
|       | O10   | x, y, z                | 2.9615       |
| O6    | O5    | x, y, z                | 2.2255       |
|       | O13   | -1+x, y, z             | 2.8243       |
|       | O14   | 1-x, 2-y, 1-z          | 2.8259       |
|       | O8    | x, y, z                | 2.1993       |
| O7    | O9    | 1-x, 2-y, 1-z          | 2.9360       |
|       | O7    | x, y, z                | 2.1993       |
| O8    | O12   | x, y, z                | 2.7768       |
|       | O12   | 1-x, 2-y, 1-z          | 2.9101       |
|       | O3    | 1-x, 2-y, 2-z          | 2.7167       |
|       | O15   | x, y, z                | 2.7225       |
|       | O10   | x, y, z                | 2.7538       |
| O9    | O1    | x, y, z                | 2.8513       |
|       | O7    | 1-x, 2-y, 1-z          | 2.9360       |
|       | O11   | x, y, z                | 2.9780       |
|       | O4    | 1-x, 2-y, 2-z          | 2.7194       |
|       | O9    | x, y, z                | 2.7538       |
|       | O13   | -1+x, y, z             | 2.8665       |
|       | O5    | x, y, z                | 2.9615       |
| O10   | O3    | x, y, z                | 2.6741       |
|       | O1    | x, y, z                | 2.8526       |
|       | O5    | x, y, z                | 2.9401       |
|       | O9    | x, y, z                | 2.9780       |
|       | O1    | x, y, z                | 2.7279       |
| O11   | O8    | x, y, z                | 2.7768       |
|       | O8    | 1-x, 2-y, 1-z          | 2.9101       |
|       | O13   | x, y, z                | 2.9309       |
|       | O5    | x, y, z                | 2.9543       |
|       | O6    | 1+x, y, z              | 2.8243       |
| O12   | O10   | 1+x, y, z              | 2.8665       |
|       | O12   | x, y, z                | 2.9309       |
|       | O6    | 1-x, 2-y, 1-z          | 2.8259       |



|     |    |               |        |
|-----|----|---------------|--------|
| O15 | O2 | 2-x, 2-y, 2-z | 2.7064 |
|     | O9 | x, y, z       | 2.7225 |

**Table S18.** Cl-Cl distances shorter than 3.5 Å in [KTb(tcpa)<sub>2</sub>(H<sub>2</sub>O)<sub>6</sub>·H<sub>2</sub>O]<sub>∞</sub> (**6.**).

| Atom1 | Atom2 | Symmetry code of Atom2 | Distance (Å) |
|-------|-------|------------------------|--------------|
| Cl1   | Cl2   | x, y, z                | 3.1281       |
|       | Cl5   | 1+x, y, z              | 3.4106       |
| Cl2   | Cl3   | x, y, z                | 3.1178       |
|       | Cl1   | x, y, z                | 3.1281       |
| Cl3   | Cl5   | 1+x, y, z              | 3.3346       |
|       | Cl4   | x, y, z                | 3.1085       |
| Cl4   | Cl2   | x, y, z                | 3.1178       |
|       | Cl3   | x, y, z                | 3.1085       |
| Cl5   | Cl8   | x, y, 1+z              | 3.2312       |
|       | Cl6   | x, y, z                | 3.1130       |
| Cl6   | Cl2   | -1+x, y, z             | 3.3346       |
|       | Cl1   | -1+x, y, z             | 3.4106       |
| Cl7   | Cl5   | x, y, z                | 3.1130       |
|       | Cl7   | x, y, z                | 3.1138       |
| Cl8   | Cl6   | x, y, z                | 3.1138       |
|       | Cl8   | x, y, z                | 3.1246       |
| Cl8   | Cl7   | x, y, z                | 3.1246       |
|       | Cl4   | x, y, -1+z             | 3.2312       |
